# Supplementary material for: Preserving Privacy of Software-Defined Networking Policies by Secure Multi-Party Computation
Source: Springer Nature journal article supplement (doi:10.1007/s11390-020-9247-5), 2020-07-01
Supplement: 11390_2020_9247_MOESM1_ESM.pdf [file 11390_2020_9247_MOESM1_ESM.pdf]

# Preserving Privacy of Software-Defined Networking Policies by Secure Multi-Party Computation

Zarezadeh M, Mala H, Khajeh H. Preserving privacy of software-defined networking policies by secure multi-party computation. JOURNAL OF COMPUTER SCIENCE AND TECHNOLOGY 35(4): 863–874 July 2020. DOI 10.1007/s11390-020-9247-5

# Research Objectives

- Proposing a method for preserving privacy of policies of software defined-networking (SDN) controllers about status of routers.
- Determining the optimum number of controllers to provide scalability for the proposed method.

# Research Method

- Considering an SDN as a system and routers as its components.
- Utilizing of the concept of structure function.
- Applying secure multi-party computation (SMC) technique for secure computing of the structure function without disclosing the status of routers.
- Modeling the problem of finding the minimum number of controllers as a multi-objective problem

# Research Results

- The proposed number of SDN controllers results in a short time for computing the structure function.
- Applying the SMC technique to preserve privacy of organization policies causes only a little delay in SDNs.
- The proposed method is applicable in secure SDN to preserve privacy of policies of network administrators.
